# Supplementary material for: Universal self-field critical current for thin-film superconductors
Source: Nat Commun. 2015 Aug 4;6:7820. doi: 10.1038/ncomms8820 (PMC4532791; doi:10.1038/ncomms8820)
Supplement: Supplementary Information — Supplementary Figures 1-4, Supplementary Tables 1, Supplementary Notes 1-6 and Supplementary References [file ncomms8820-s1.pdf]

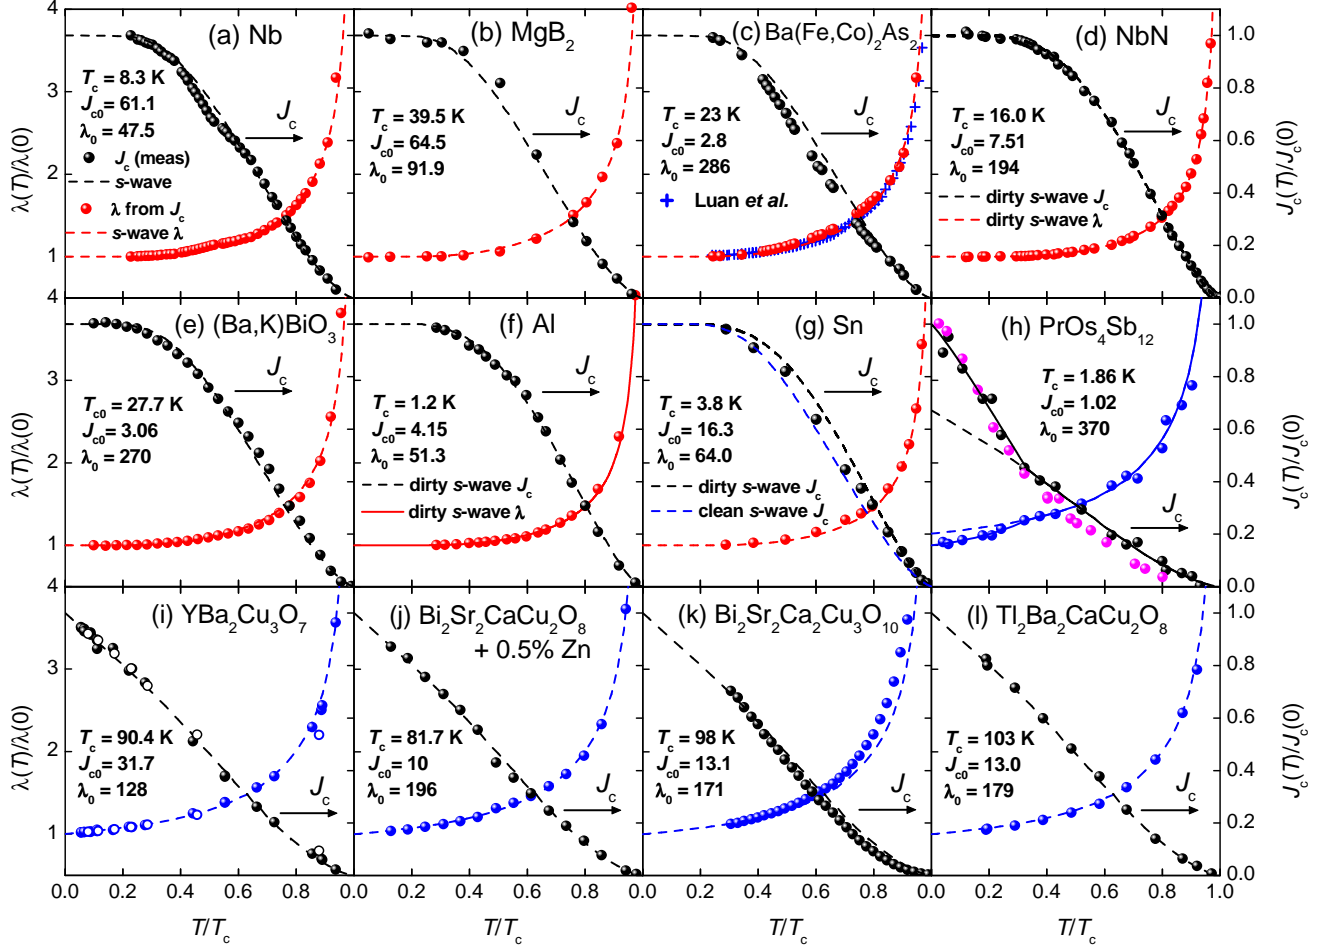

**Supplementary Figure 1 | Individual plots of  $\lambda(T)$  and  $J_c(T, \text{sf})$ .** The temperature dependence of the normalized penetration depth,  $\lambda(T)/\lambda(0)$  (left hand scale), and critical current density,  $J_c(T)/J_c(0)$  (right-hand scale), for different  $s$ -wave superconductors (red symbols and curves): (a) Nb, (b)  $\text{MgB}_2$ , (c)  $\text{Ba}(\text{Fe}, \text{Co})_2\text{As}_2$ , (d) NbN, (e)  $(\text{Ba}, \text{K})\text{BiO}_3$ , (f) Al and (g) Sn, and different  $d$ -wave superconductors (blue symbols and curves): (h)  $\text{PrOs}_4\text{Sb}_{12}$ , (i)  $\text{YBa}_2\text{Cu}_3\text{O}_7$  (solid symbols) and 1% Ca-doped  $\text{YBa}_2\text{Cu}_3\text{O}_7$  (open symbols), (j)  $\text{Bi}_2\text{Sr}_2\text{CaCu}_2\text{O}_8 + 5\% \text{ Zn}$ , (k)  $\text{Bi}_2\text{Sr}_2\text{Ca}_2\text{Cu}_3\text{O}_{10}$  and (l)  $\text{Tl}_2\text{Ba}_2\text{CaCu}_2\text{O}_8$ . The dashed red curves are the  $s$ -wave weak-coupling  $T$ -dependence of  $\lambda(T)$ , the dashed blue curves are the  $d$ -wave weak-coupling  $T$ -dependence of  $\lambda(T)$  and the dashed black curve is  $J_c$  calculated from this using equations (3) or (4). Normalization parameters,  $T_c$ ,  $J_{c0}$  and  $\lambda_0 = \lambda(0)$  are listed in each panel and summarized in Supplementary Table 1. In the case of (h) both  $J_c$  and  $\lambda$  are calculated from measurements of  $H_{c1}$  and the calculated  $J_c$  compared with measured values (magenta data points).  $J_{c0}$  is given in units of  $\text{MA cm}^{-2}$  and  $\lambda_0$  in nm.

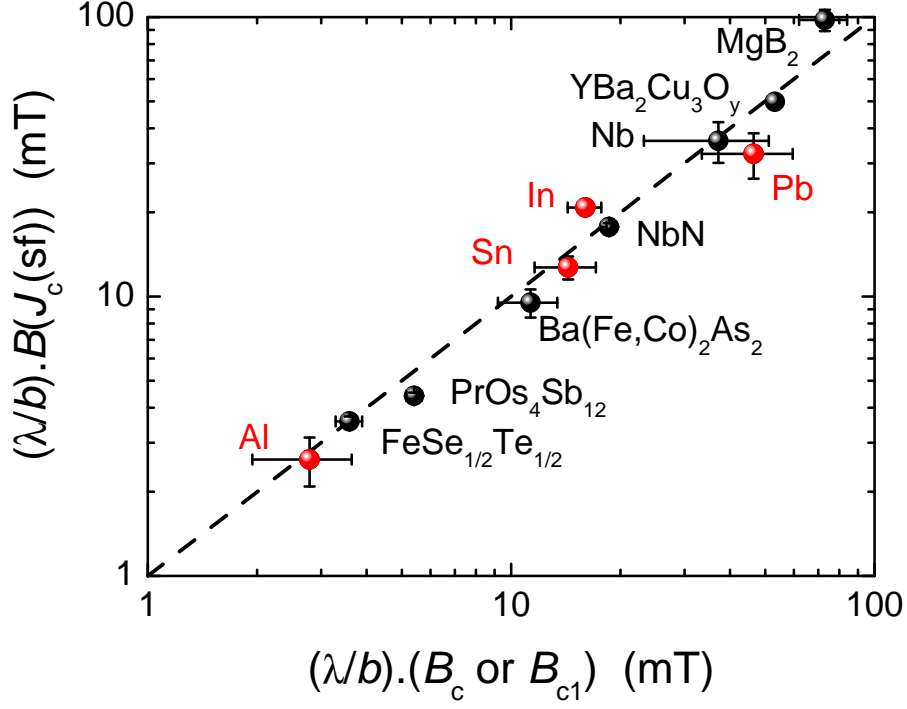

**Supplementary Figure 2 | Silsbee's hypothesis confirmed.** Plot of the  $x$ -component of the self field,  $B_x[J_c(sf)]$  on the surface of a thin-film tape versus, for type II superconductors,  $B_{c1}$  given by equation (2) (black symbols), or for type I versus  $B_c$  given by equation (1) (red symbols). Error bars reflect the uncertainty in reported values of  $\lambda$ ; e.g. for aluminium  $\lambda_0 = 50 \pm 10$  nm, as listed in Supplementary Table 1. Both axes are multiplied by  $(\lambda/b)$  to remove the implicit  $b$ -dependence of both of these fields.

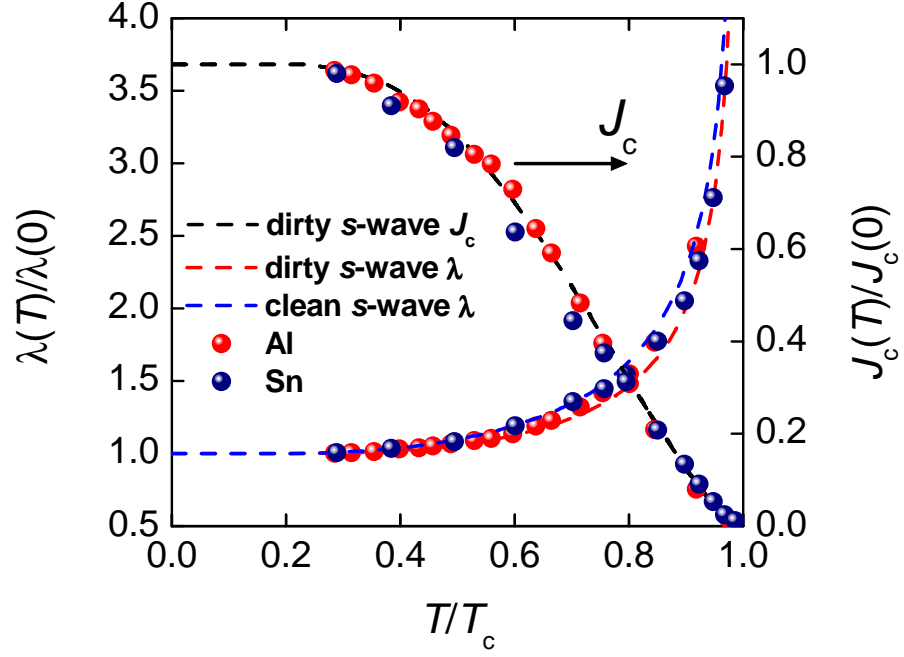

**Supplementary Figure 3 | The effect of temperature dependence of  $\kappa$ .** The effect on  $\lambda(T)$  of incorporating the full  $T$ -dependence of  $\kappa$  using MS equation (11) for both In and Al.  $\lambda(T)$  values are shifted by about half the separation of the clean- and dirty-limit curves for  $s$ -wave  $\lambda(T)$ .

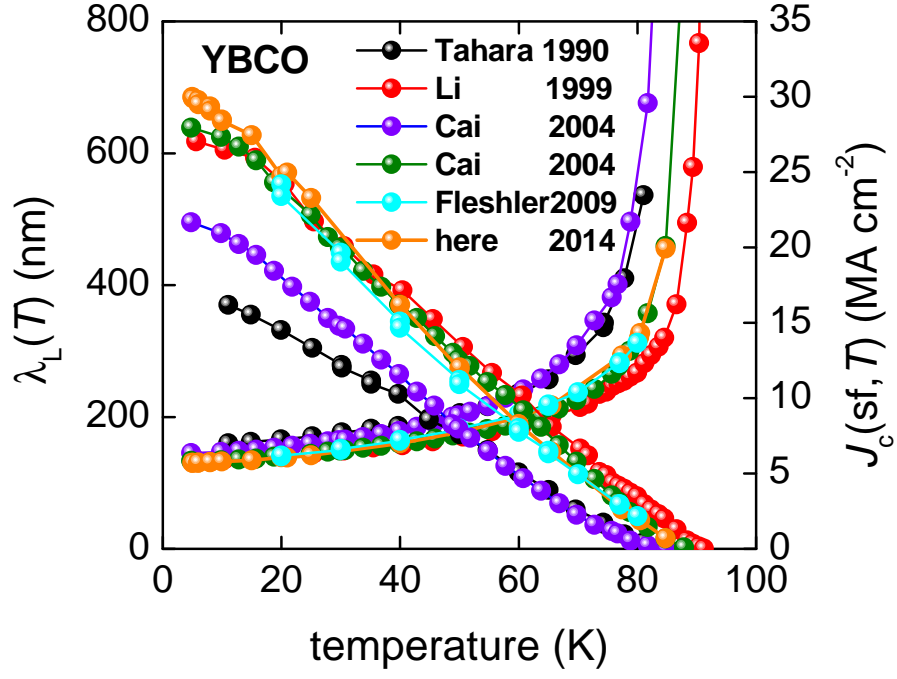

**Supplementary Figure 4 | Increasing  $J_c$  over time.** The  $T$ -dependence of  $J_c(sf)$  and  $\lambda$  calculated from equation (4) for thin films of YBCO over time [1, 2, 3, 4].

| Type   | Sample                                                                              | $T_c$<br>(K) | $2b$<br>(nm) | $J_{c0}$<br>(MA cm <sup>-2</sup> ) | $\kappa$      | $\lambda_0$ calc<br>(nm) | $\lambda_0$ expt<br>(nm)      | $\Delta_0$ calc<br>(meV) | $\Delta_0$ expt<br>(meV) |
|--------|-------------------------------------------------------------------------------------|--------------|--------------|------------------------------------|---------------|--------------------------|-------------------------------|--------------------------|--------------------------|
| s-wave | Nb                                                                                  | 8.3          | 20           | 61.1 [5]                           | 1 [6]         | 47.5                     | 47 [7] 59 [8]<br>41±4 [9]     | 1.26                     | 1.55 [10]                |
|        | MgB <sub>2</sub>                                                                    | 41.4         | 100          | 84.5 [11]                          | 26 [12]       | 83.6                     | 85 [13]                       | 7.0                      | 7.1/2.3 [15]             |
|        | Ba(Fe,Co) <sub>2</sub> As <sub>2</sub>                                              | 41.4         | 100          | 64.5 [11]                          |               | 91.7                     | 95, 100 [14]                  | 7.1                      |                          |
|        |                                                                                     | 23           | 90           | 2.8 [16]                           | 90 [17]       | 285                      | 270 [17] 274 [18]             | 2.8                      | 3 (s-wave),              |
|        |                                                                                     | 23           | 90           | 2.5 [16]                           |               | 299                      | 307 [19]                      | 2.9                      | 8 (nodal) [20]           |
|        |                                                                                     | 23           | 90           | 3.1 [16]                           |               | 277                      |                               | 3.1                      |                          |
|        | NbN                                                                                 | 16.0         | 22.5         | 7.51 [21]                          | 40 [22]       | 194                      | 200 [22]<br>194 [23]          | 2.85                     | 2.56 [24]                |
|        |                                                                                     | 14.6         | 8            | 8.00 [25]                          |               | 190                      |                               | 2.94                     |                          |
|        |                                                                                     | 14.6         | 8            | 8.81 [25]                          |               | 184                      |                               | 3.09                     |                          |
|        |                                                                                     | 14.2         | 8            | 8.66 [26]                          |               | 185                      |                               | 2.99                     |                          |
|        |                                                                                     | 14.2         | 8            | 8.13 [26]                          |               | 189                      |                               | 2.89                     |                          |
|        | (Ba,K)BiO <sub>3</sub>                                                              | 27.7         | 150          | 3.06 [27]                          | 60 [28]       | 270                      | 289 [29] 270 [30]<br>340 [31] | 4.46                     | 4.5 [32] 4.3[33]         |
|        | amorph-W                                                                            | 4.7          | 50           | 0.35 [34]                          | 90 [34]       | 550±12                   | -                             | 0.71±0.02                | 0.66 [35]                |
|        | Rb <sub>3</sub> C <sub>60</sub>                                                     | 30.5         |              | 2.15 [36]                          | 124 [37]      | 319                      | 247 [37]<br>420 [38]          | 3.95±0.2                 | 3.75 [39]                |
|        |                                                                                     | 26.3         |              | 7.0 [40]                           |               | 215                      |                               |                          |                          |
|        | YNi <sub>2</sub> B <sub>2</sub> C                                                   | 15.5         | 600          | 2.12 [41]                          | 15 [42]       | 158†                     | 120 [43]                      | 2.44±0.05                | 2/2.1/2.5 [44]           |
|        | Al*                                                                                 | 1.203        | 89           | 4.15 [45]                          | 0.03 [22]     | 51.3                     | 50±10 [46]                    | 0.21                     | 0.179 [10]               |
|        |                                                                                     | 1.196        | 98           | 4.51 [45]                          |               | 49.9                     | 46-51 [47]                    | 0.21                     |                          |
|        |                                                                                     | 1.203        | 99           | 3.45 [45]                          |               | 54.5                     | 51.5 [48]                     | 0.21                     |                          |
|        |                                                                                     | 1.267        | 34           | 3.81 [45]                          |               | 52.5                     |                               | 0.18                     |                          |
|        |                                                                                     | 1.356        | 20           | 3.68 [45]                          |               | 53.1                     |                               | 0.19                     |                          |
|        | Sn*                                                                                 | 3.8          | 50           | 16.3 [49]                          | 0.23 [22]     | 63.3                     | 56-68 [50]                    | 0.62                     | 0.593 [10]               |
|        | Pb*                                                                                 | 7.2 [51]     | 47.5         | 52.6 [49]                          | 0.48 [22]     | 55.3                     | 39-59 [51, 52]                |                          |                          |
|        | In*                                                                                 | 3.41         | 100          | 41.3 [53]                          | 0.11 [22]     | 36.5                     | 40,38 [22, 53]                | 0.537                    | 0.541 [10]               |
| d-wave | FeSe <sub>1/2</sub> Te <sub>1/2</sub>                                               | 12.5         | 100          | 0.555 [54]                         | 180 [55]      | 490                      | 491 [55] 534 [56]             | 1.69                     | 1.70 [57]                |
|        | PrOs <sub>4</sub> Sb <sub>12</sub>                                                  | 1.86         |              | 1.02 [58]                          | 29.7 [59, 60] | 370                      | 353 [61] 344 [62]             | 0.19                     | 0.207 [62]               |
|        | (Y,Dy)Ba <sub>2</sub> Cu <sub>3</sub> O <sub>7</sub>                                | 90.4         | 850          | 31.7 [here]                        | 95 [22]       | 128                      | 125 [63]                      | 16.6                     | 16.7 [64]                |
|        | (Nd,Er,Gd)Ba <sub>2</sub> Cu <sub>3</sub> O <sub>7</sub>                            | 91           | 50           | 30.0 [1]                           | 95 [22]       | 130                      | 118 [65]                      | 16.9                     | 16.7 [64]                |
|        | NdBa <sub>2</sub> Cu <sub>3</sub> O <sub>7</sub>                                    | 92.5         | 100-200      | 29 [2]                             | 95 [22]       | 131±2                    |                               | 18.7±3.3                 | 16.7 [64]                |
|        | Bi <sub>2</sub> Sr <sub>2</sub> CaCu <sub>2</sub> Zn <sub>0.01</sub> O <sub>8</sub> | 88           | 300-420      | 7.43 [66]                          | 170 [67]      | 193                      | 180 [68]                      | 13.4                     | 20.5, 23 [69, 70]        |
|        | Bi <sub>2</sub> Sr <sub>2</sub> Ca <sub>2</sub> Cu <sub>3</sub> O <sub>10</sub>     | 92           | 100-150      | 13.5 [71]                          | 170 [72]      | 160                      | 151-155 [73]                  | 10.8                     | 30 [70]                  |
|        | Tl <sub>2</sub> Ba <sub>2</sub> CaCu <sub>2</sub> O <sub>8</sub>                    | 103          | 650±50       | 13.0 [74]                          | 150 [75]      | 174                      | 139 [76] 188 [65]             | 15.7                     | 16-28 [77]               |
|        | HgBa <sub>2</sub> CaCu <sub>2</sub> O <sub>6</sub>                                  | 118          | 250          | 10.4 [78]                          | 123 [79]      | 188                      | 145 [80] 188 [65]             | 16.1                     | 32 [81]                  |

**Supplementary Table 1 | Parameters used or calculated in the analysis.** References for  $T_c$  and film thickness,  $2b$ , are listed by the  $J_c$  values. \*Type I superconductors. †using the  $(\lambda/b) \tanh(b/\lambda)$  correction to MS equation (4).

## Supplementary Note 1 | data for individual samples

We show in Supplementary Fig. 1 individual plots of  $\lambda(T)/\lambda(0)$  and  $J_c(T)/J_{c0}$  versus  $T/T_c$  for each material in Fig. 1 of the MS. The red and blue dashed curves are the  $s$ - or  $d$ -wave  $T$ -dependence of  $\lambda(T)/\lambda(0)$  [82], respectively, which are presented for comparison with the calculated values. All input or calculated parameter values are individually listed in Supplementary Table 1.

The first six examples in Supplementary Fig. 1 are  $s$ -wave superconductors. Starting with Nb, panel (a) shows the  $J_c$  data from Rusanov *et al.* [5], and the values of  $\lambda(T)$  calculated using equation (3) with  $\kappa = 1$  [6]. The dashed red curve shows the weak-coupling  $s$ -wave dependence.  $\lambda(0)$  is found to be 47.5 nm which agrees with the observed values of 47 nm [7], 59 nm [8] and  $41 \pm 4$  [9]. For the  $\lambda(T)$  fit we used  $T_c = 8.3$  K [5].

Supplementary Fig. 1(b) shows the same analysis for MgB<sub>2</sub> using  $J_c$  data from Zhuang *et al.* [11] and  $\kappa = 26$  [12] to calculate  $\lambda(T)$ . The inferred value  $\lambda_0 = 91.9$  nm agrees well with the range of values reported from  $\mu$ SR, 85 - 100 nm [13, 14]. And there is a good fit to the  $s$ -wave weak-coupling model except for a small divergence in the mid-temperature range which possibly arises from two gaps coexisting on distinct bands [83]. Zhuang *et al.* [11] report a second film with higher  $J_c$  still. For this we find  $J_c(0) = 84.5$  MA cm<sup>-2</sup> and  $\lambda_0 = 83.6$  nm, again in excellent agreement with reported values.

Similarly, Supplementary Fig. 1(c) shows  $\lambda(T)$  calculated for Ba(Fe,Co)<sub>2</sub>As<sub>2</sub> using  $J_c$  data from Rall *et al.* [16] with  $\kappa = 90$  [17]. The deduced value of  $\lambda_0 = 286$  nm agrees well with the measured value of 270 nm [17] and there is a good fit to the  $s$ -wave model with the small departure probably also arising from two-gap behavior.

Data for NbN, shown in Supplementary Fig. 1(d), is based on the  $J_c$  data from Fig. 3 of Clem *et al.*, [21],  $\kappa = 40$  [22]. The calculated  $\lambda(T)$  is fitted to the dirty  $s$ -wave model (dashed red curve) which, with equation (3), is then used to calculate  $J_c(T)$  shown by the dashed black curve. The fits are excellent and the calculated  $\lambda_0$  value of 194 nm agrees with reported measurements by Poole *et al.* [22] (200 nm) and Komiyama *et al.* [23] (194 nm).

Supplementary Fig. 1(e) shows the analysis for (Ba,K)BiO<sub>3</sub> using the critical current data of Schweinfurth *et al.* [27] and  $\kappa = 60$  [28]. We calculate  $\lambda_0 = 270$  nm which is consistent with reported values 289 nm [29], 270 [30] and 340 nm [31] and we derive the value  $\Delta_0 = 4.46$  meV, again very consistent with reported values of 4.5 meV [32] and 4.3 meV [33].

The results for aluminium are summarized in Supplementary Fig. 1(f). We take  $\kappa = 0.03$  [22] and analyze the  $J_c$  data of Romijn *et al.* [45] who present measurements for 6 samples. The figure shows results for sample 3 but similar results are found for all samples. The value of  $\lambda_0 = 51.3$  nm is in good agreement with reported values of  $50 \pm 10$  nm [46], and the dashed curves are the dirty  $s$ -wave calculation. For the other samples we find  $\lambda_0$  values of 49.9 nm (#1), 54.5 nm (#2), 52.5 nm (#4) and 53.1 nm (#5). Supplementary Fig. 1(g) shows that similar results are also found for tin.  $J_c$  data are from Hunt [49] and we obtain  $\lambda_0 = 63.3$  nm in excellent agreement with the range 56 - 68 nm reported by Peabody [50]. The  $\lambda(T)$  fit seems best when intermediate between clean and dirty  $s$ -wave.

We perform the analysis of  $J_c$  data for  $\text{FeSe}_{0.5}\text{Te}_{0.5}$  [54] using  $\kappa = 180$  [55] (not shown in the figure). The fit is excellent with  $\lambda_0 = 490$  nm in good agreement with the reported  $\lambda_0$  values of 491 nm [55] and 534 nm [56]. However, the situation is complicated by the likely presence of multiple gaps of differing symmetry [84] and the data of Belingeri [54] does not extend to low enough temperature to settle the issue.

Turning now to the class of  $d$ -wave superconductors, in Supplementary Fig. 1(h) for  $\text{PrOs}_4\text{Sb}_{12}$  we used a slightly different approach. From reported data for  $H_{c1}$  [58] we calculated both  $J_c(T)$  and  $\lambda(T)$  from equation (4) using  $\kappa = 29.66$ . Each of these parameters reveals a transition to a second superconducting phase below 0.6 K which results in an additional reduction of  $\lambda(T)$ . With these coexisting phases we simply added  $d$ -wave superfluid densities to achieve a fit to the data. Most importantly for our central thesis, the measured  $J_c(T)$  (from remanent magnetization measurements [58]) shows an enhancement below 0.65 K that almost exactly mirrors our calculated  $J_c(T)$ .

The figure is completed by several high- $T_c$  cuprates. In Supplementary Fig. 1(i) for  $\text{YBa}_2\text{Cu}_3\text{O}_7$  (solid data points) we used our own epitaxial MOD-deposited 2G tapes with lithographically-etched conductance bridges and silver electrodes. The overall composition was  $(\text{YDy}_{0.5})\text{Ba}_2\text{Cu}_3\text{O}_7$  and film thickness  $\approx 0.8\mu\text{m}$ . We used  $\kappa = 95$  [22] and the calculated  $\lambda_0 = 128$  nm is an excellent match with the single-crystal value from  $\mu\text{SR}$ ,  $\lambda_0 = 125$  nm [63] which also concurs with polycrystalline data [65] and infrared data [65, 85]. This indicates maximum practical self-field performance of these 2G tapes. Open data points are for 1% Ca-doped  $\text{YBa}_2\text{Cu}_3\text{O}_7$  with  $T_c = 88$  K. This also shows an excellent fit with  $\lambda_0 = 144$  nm, the increase being due to impurity scattering and/or overdoping where the superfluid density is known to fall [86]. The combined data shown in Supplementary Fig. 1(i) for YBCO nicely

shows the canonical  $d$ -wave inflexion in the  $T$ -dependence of  $J_c(T)$  with negative curvature at low- $T$  and positive curvature at high- $T$ .

In Supplementary Fig. 1(j) for  $\text{Bi}_2\text{Sr}_2\text{CaCu}_2\text{O}_8 + 0.5\% \text{ Zn}$  we use the  $J_c$  data of Wagner *et al.* [66] which extends to quite low temperature. Together with  $\kappa = 170$  (as an average of many different reports e.g. see [67]) we find a good  $d$ -wave fit to  $\lambda(T)$  and the  $J_c(T)$  data again shows the distinctive  $d$ -wave inflexion. The deduced  $\lambda_0 = 193 \text{ nm}$  agrees quite well with the measured value of  $180 \text{ nm}$  [68]. It is expected to be a little high due to the suppression of superfluid density by the small fraction of Zn impurity scatterers.

In contrast Supplementary Fig. 1(k) for  $\text{Bi}_2\text{Sr}_2\text{Ca}_2\text{Cu}_3\text{O}_{10}$  shows  $\lambda(T)$  rises above the  $d$ -wave fit at higher  $T$  and this is likely due to the presence of intergrowths of  $\text{Bi}_2\text{Sr}_2\text{CaCu}_2\text{O}_8$ . Despite an onset at  $110 \text{ K}$  the rather low  $T_c$  of  $92 \text{ K}$  [71] for these films would appear to support this.  $\lambda(T)$  and the superfluid density are very sensitive to such intergrowth effects and this evidently plays through into the detailed behavior of  $J_c(T)$ . Here we used  $J_c$  data of Hänisch [71] along with  $\kappa = 170$  [72].

Finally, in Supplementary Fig. 1(l) for  $\text{Tl}_2\text{Ba}_2\text{CaCu}_2\text{O}_8$  the  $J_c$  data from Holstein [74] and  $\kappa = 150$  [75] gives a good  $d$ -wave fit across the full  $T$ -range for both  $\lambda(T)$  and  $J_c(T)$  indicating a good quality single-phase film. The calculated value  $\lambda_0 = 174 \text{ nm}$  is in reasonable agreement with the experimental values of  $139 \text{ nm}$  [76] and  $188 \text{ nm}$  [65].

## Supplementary Note 2 | Silsbee's hypothesis demonstrated

We now show explicitly that, for  $b \leq \lambda$ , the field on the flat face of a thin film conductor when  $J = J_c(\text{sf})$  is indeed the critical field as proposed by Silsbee [87]. From equation (12) of Brojeny and Clem [88] the  $x$ -component of  $B$  at  $y = \pm b$  for a uniform current density is  $-\mu_0 b J_c$ . Because this field is  $b$ -dependent we multiply by the factor  $(\lambda/b)$  to remove this dependence. Similarly, as noted in equation (11) of the MS  $B_{c1}$  scales as  $(b/\lambda)$  when  $b < \lambda$ , so again we remove this  $b$ -dependence by multiplying by  $(\lambda/b)$ . Thus, for type II superconductors  $(\lambda/b) \times B_x(J_c)$  is plotted in Supplementary Fig. 2 versus  $(\lambda/b) \times B_{c1}$  given by equation (2) (black symbols), or for type I superconductors versus  $(\lambda/b) \times B_c$  given by equation (1) (red symbols). The correspondence is excellent over nearly two orders of magnitude, and since both axes are multiplied by the same factor this confirms Silsbee's hypothesis.

## Supplementary Note 3 | Temperature dependence of $\kappa$

We now consider the effect of the until-now ignored  $T$ -dependence of  $\kappa$ . For this we adopt the weak-coupling  $s$ -wave  $T$ -dependence of  $\lambda(T) \times \Delta(T)$  [82]. The result is shown in Supplementary Fig. 3 for the type I superconductors Al and Sn. Without this correction both show a good fit to the dirty  $s$ -wave model (see Supplementary Fig. 1(e) and (f)). With the correction the calculated  $\lambda(T)$  shifts towards the clean-limit behaviour. The effect is small, amounting to half the shift between the dirty- and clean-limits, and we conclude that our initial approximation of a constant  $\kappa$  is not unreasonable.

#### Supplementary Note 4 | Further comments on pinning

A key conclusion of our work is that  $J_c(\text{sf})$  is fundamentally limited by  $\lambda$  and not by pinning when the thickness is comparable to  $\lambda$ . As noted, this challenges a prevailing view [89, 90, 91]. In addition to the literature examples discussed in the MS which support our view we note here further examples where marked increases in pinning, and associated improvement in in-field  $J_c$ , are demonstrated while there is no observed change in  $J_c(\text{sf})$ . These include MacManus-Driscoll, *et al.* [92], Strickland *et al.* [93], Birlick *et al.* [94], Lu *et al.* [95] and Haruta *et al.* [96].

The remaining exceptional example is that of Dinner *et al.* [91] in which the introduction of nanopores in Nb raises  $J_c(\text{sf})$  by a factor of 30. But here the film thickness is of the order of the coherence length,  $\xi$ , and the nanopore spacing is just a few times  $\xi$ . The nanopores therefore represent radical modification and it is not impossible that ion milling through the  $\text{Al}_2\text{O}_3$  capping layer results in the formation of  $\text{Nb}_3\text{Al}$  with consequent increase in  $J_c(\text{sf})$  due to a smaller  $\lambda$  value. In any case, this enhanced  $J_c(\text{sf})$  is still less than that reported by Rusanov *et al.* [5] at the same temperature, as presented in Supplementary Fig. 1(a) and Supplementary Table 1. It thus remains to be demonstrated that pinning centres created by any means actually increase  $J_c(\text{sf})$ .

#### Supplementary Note 5 | London versus Ginzburg-Landau depairing currents

We note that equation (3) is identical to the London depairing current density  $J_d^L$  [97] and a criticism could arise from the fact that it is actually larger than the so-called Ginzburg-Landau pairbreaking current density [97]

$$J_d^{GL} = \frac{\phi_0 \kappa}{3\sqrt{3}\pi\mu_0\lambda^3(T)}, \quad (1)$$

by a factor  $(3/2)^{3/2} = 1.84$ . Were one to adopt this as the fundamental  $J_c$  limit then after taking the cube root  $\lambda$  values calculated in Fig. 1(a) of the MS for type I superconductors will be reduced by a factor 0.82. Actually, this could possibly be accommodated in the figure. On the other hand the relative merits of the two depairing limits have not been tested and, moreover, the theoretical calculation of  $J_d^{GL}$  requires an approximation in neglecting the gradient term [97]. For the time being equation (3) seems to be well satisfied and we retain it as an effective measure of  $J_c$  for this class of superconductor.

### **Supplementary Note 6 | Increase in $J_c$ over time for YBCO**

Finally, the improvement in  $J_c(\text{sf})$  over time for  $\text{YBa}_2\text{Cu}_3\text{O}_{7-\delta}$  is summarized in Supplementary Fig. 4 [1, 2, 3, 4]. Notably all the recent data return values of  $\lambda_0$  close to the observed value and all data retain essentially the same  $T$ -dependent shape. Even the early data from 1990 show the distinctive  $d$ -wave linear- $T$  temperature dependence several years before this particular symmetry was established. Some however, display a possible  $T^2$  dependence at low- $T$  more characteristic of the superfluid density in a dirty  $d$ -wave scenario. This suggests a critical test of our hypothesis, namely, to establish, by systematic measurements of  $J_c(\text{sf})$ , a crossover from linear- $T$  to  $T^2$  behavior with increasing impurity scattering. This work is proceeding.

## Supplementary References

---

- [1] Cai, C., Holzapfel, B., Hänisch, J., Fernández, L., & Schultz, L. High critical current density and its field dependence in mixed rare earth (Nd,Eu,Gd)Ba<sub>2</sub>Cu<sub>3</sub>O<sub>7- $\delta$</sub>  thin films. *Appl. Phys. Lett.* **84**, 377-379 (2004).
- [2] Li, Y. & Tanabe, K. Influence of deposition parameters on superconductivity and surface morphology of NdBa<sub>2</sub>Cu<sub>3</sub>O<sub>7- $\delta$</sub>  films grown by pulsed laser deposition with a single crystal target. *Physica C* **324**, 198-210 (1999).
- [3] Tahara, S., Anlage, S.M., Halbritter, J., Eom, C.B., Fork, D.K., Geballe, T.H. & Beasley, M.R. Critical currents, pinning, and edge barriers in narrow YBa<sub>2</sub>Cu<sub>3</sub>O<sub>7- $y$</sub>  thin films. *Phys. Rev. B* **41**, 11203-11208 (1990).
- [4] Fleshler, S., *et al.* Scale-up of 2G wire manufacturing at American Superconductor Corporation. *Physica C* **469**, 1316-1321 (2009).
- [5] Rusanov, A.Yu., Hesselberth, M.B.S. & Aarts, J. Depairing currents in superconducting films of Nb and amorphous MoGe. *Phys. Rev. B* **70**, 024510 (2004).
- [6] Kim, D.H. *et al.* Resistive measurement of the temperature dependence of the penetration depth of Nb in Nb/AlO<sub>x</sub>/Nb Josephson junctions. *J. Appl. Phys.* **75**, 8163-8167 (1994).
- [7] Maxfield, B.W. & McLean, W.L. Superconducting penetration depth of niobium. *Phys. Rev. A* **139**, 1515-1522 (1965).
- [8] Masuradze, A., *et al.* Evidence for Cooper pair diffraction on the vortex lattice of superconducting niobium. *Phys. Rev. B* **88**, 140509(R) (2013).
- [9] Felcher, G.P., Kampwirth, R.T., Gray, K.E., & Felici, R. Polarized-neutron reflections: a new technique used to measure the magnetic field penetration depth in superconducting niobium. *Phys. Rev. Lett.* **52**, 1539 (1984).
- [10] Wolf, E.L., Principles of Electron Tunneling Spectroscopy (Oxford University Press, New York, 1985), pp. 524-529.
- [11] Zhuang, C.G., Meng, S., Zhang, C.Y., Feng, Q.R., Gan, Z.Z., Yang, H., Jia, Y., Wen, H.H., & Xi, X.X. Ultrahigh current-carrying capability in clean MgB<sub>2</sub> films. *J. Appl. Phys.* **104**, 013924 (2008).
- [12] Buzea, C & Yamashita, T. Review of the superconducting properties of MgB<sub>2</sub>. *Supercond.*

- Sci. Technol.* **14**, R115-R146 (2001).
- [13] Panagopoulos, C., Rainford, B. D., Xiang, T., Scott, C. A., Kambara, M. & Ir, I. H. Penetration depth measurements in  $\text{MgB}_2$ : evidence for unconventional superconductivity. *Phys. Rev. B* **64** 094514 (2001).
  - [14] Niedermayer, Ch., Bernhard, C., Holden, T., Kremer, R.K., & Ahn, K. Muon spin relaxation study of the magnetic penetration depth in  $\text{MgB}_2$ . *Phys. Rev. B* **65**, 094512 (2002).
  - [15] Iavarone, M. *et al.* Directional scanning tunneling spectroscopy in  $\text{MgB}_2$ . *Physica C* **385** 215 (2003).
  - [16] Rall, D. *et al.* Critical current densities in ultrathin  $\text{Ba}(\text{Fe},\text{Co})_2\text{As}_2$  microbridges. *Phys. Rev. B* **83**, 134514 (2011).
  - [17] Gordon R.T. *et al.* Doping evolution of the absolute value of the London penetration depth and superfluid density in single crystals of  $\text{Ba}(\text{Fe}_{1-x}\text{Co}_x)_2\text{As}_2$ . *Phys. Rev. B* **82**, 054507 (2010).
  - [18] Luan, L., *et al.* Local measurement of the superfluid density in the pnictide superconductor  $\text{Ba}(\text{Fe}_{1-x}\text{Co}_x)_2\text{As}_2$  across the superconducting dome. *Phys. Rev. Lett.* **106**, 067001 (2011).
  - [19] Williams, T.J., *et al.* Superfluid density and field-induced magnetism in  $\text{Ba}(\text{Fe}_{1-x}\text{Co}_x)_2\text{As}_2$  and  $\text{Sr}(\text{Fe}_{1-x}\text{Co}_x)_2\text{As}_2$  measured with muon spin relaxation. *Phys. Rev. B* **84**, 094512 (2010).
  - [20] Fischer, T. *et al.* Highly anisotropic energy gap in superconducting  $\text{Ba}(\text{Fe}_{0.9}\text{Co}_{0.1})_2\text{As}_2$  from optical conductivity measurements. *Phys. Rev. B* **82**, 224507 (2010).
  - [21] Clem, J.R., Bumble, B., Raider, S.I., Gallagher, W.J. & Shih, Y.C. Ambegaokar-Baratoff-Ginzburg-Landau crossover effects on the critical current density of granular superconductors. *Phys. Rev. B* **35**, 6637-6642 (1987).
  - [22] Poole, C.P., Farach, H.A., Creswick, R.J., Prozorov, R. *Superconductivity* Ch. 12, p. 343 (Academic Press, London, 2007).
  - [23] Komiyama, B., Wang, Z., & Tonouchi, M. Penetration depth measurements of single-crystal NbN films at millimeter-wave region. *Appl. Phys. Lett.* **68**, 562-563 (1996).
  - [24] Kihlstrom, K.E., Simon, R.W. & Wolf, S.A., Tunneling  $\alpha^2 F(\omega)$  from sputtered thin-film NbN. *Phys. Rev. B* **32**, 1843 (1985).
  - [25] Bartolf, H., Engel, A., Schilling, A., Ilin, K. & Siegel, M. Fabrication of metallic structures with lateral dimensions less than 15 nm and  $J_c(T)$ -measurements in NbN micro- and nanobridges. *Physica C* **468**, 793-796 (2008).
  - [26] Engel, A., Bartolf, H., Schilling, A., Il'in, K., Siegel, M., Semenov, A. & Hubers, H.-W.

- Temperature- and field-dependence of critical currents in NbN microbridges. *J. Phys. Conf. Series* **97**, 012152 (2008).
- [27] Schweinfurth, R. A., Platt, C. E., Teepe, M. R. & van Harlingen, D. J. Electrical and magnetic properties of laser-deposited  $\text{Ba}_{1-x}\text{K}_x\text{BiO}_3$  thin films. *Appl. Phys. Lett.* **61**, 480-482 (1992).
- [28] Barilo, S. N., Shiryayev, S. V., Gatal'skaya, V. I., Lynn, J. W., Baran, M., Szymczak, H., Szymczak, R. & Dew-Hughes, D. Scaling of magnetization and some basic parameters of  $\text{Ba}_{1-x}\text{K}_x\text{BiO}_3$  superconductors near  $T_c$ . *Phys. Rev.* **58**, 12355 (1998).
- [29] Mosley, W. D., Liu, J.Z., Matsushita, A., Lee, Y. P., Klavins, P. & Shelton, R. N. Preparation and superconductivity of  $\text{Ba}_{1-x}\text{K}_x\text{BiO}_3$  single crystals.
- [30] Uchida, T., Nakamura, S., Suzuki, N., Nagata, Y., Mosley, W. D., Lan, M. D., Klavins, P. & Shelton, R. N. Effect of growth conditions on the superconductivity of  $\text{Ba}_{1-x}\text{K}_x\text{BiO}_3$  crystals. *Physica C* **215**, 350-358 (1993).
- [31] Ansaldo, E. J., Wang, Z. R., Cho, J., Johnston, D. C. & Riseman, T. M. Magnetic penetration depth of  $\text{Ba}_{0.625}\text{K}_{0.375}\text{BiO}_3$ . *Physica C* **185-189**, 1889-1890 (1991).
- [32] Huang, Q., Zasadzinski, J. F., Tralshawala, N., Gray, K. E., Hinks, D. G., Peng, J. L. & Greene, R. L. Tunnelling evidence for predominantly electron-phonon coupling in superconducting  $\text{Ba}_{1-x}\text{K}_x\text{BiO}_3$  and  $\text{Nd}_{2-x}\text{Ce}_x\text{CuO}_{4-y}$ . *Nature* **347**, 369-372 (1990).
- [33] Kosugi, M., Akimitsu, J., Uchida, T., Furuya, M., Nagata, Y. & Ekino, T. Tunneling studies on  $\text{Ba}_{1-x}\text{K}_x\text{BiO}_3$  single crystals with  $T_c = 15\text{-}30$  K. *Physica C* **229**, 389-395 (1994).
- [34] Sun, Y., Wang, J., Zhao, W., Tian, M., Singh, M. & Chan, M.H.W. Voltage-current properties of superconducting amorphous tungsten nanostrips. *Scientific Rep.* **3**, 2307 (2013).
- [35] Guillaumon, I., Suderow, H., Vieira, S., Fernández-Pacheco, A., Sesé, J., Córdoba, R., De Teresa, J.M., & Ibarra, M.R. Nanoscale superconducting properties of amorphous W-based deposits grown with a focused-ion-beam. *New J. Phys.* **10**, 093005 (2008).
- [36] Tai, M.F., Chang, G.F. & Lee, M. W. Vortex-lattice melting in superconducting fullerene  $\text{Rb}_3\text{C}_{60}$ . *Phys. Rev. B* **52**, 1176-1180 (1995).
- [37] Sparn, G., Thompson, J.D., Whetten, R.L., Huang, S.-M., Kaner, R.B., Diederich, F., G. Grüner & Holczer, K. Pressure and field dependence of superconductivity in  $\text{Rb}_3\text{C}_{60}$ . *Phys. Rev. Lett.* **68**, 1228-1231 (1992).
- [38] Uemura, Y.J., Keren, A., Le, L.P., Luke, G.M., Wu, W.D., Tsai, J.S., Tanigaki, K., Holczer, K., Donovan, S. & Whetten, R.L. System dependence of the magnetic-field penetration depth

- in C<sub>60</sub> superconductors. *Physica C* **235-240**, 2501-2502 (1994).
- [39] Degiorgi, L., Wachter, P., Grüner, G., Huang, S.-M., Wiley, J., & Kaner, R. B., Optical response of the superconducting state of K<sub>3</sub>C<sub>60</sub> and Rb<sub>3</sub>C<sub>60</sub>, *Phys. Rev. Lett.* **69**, 2987-2990 (1992).
- [40] Glenis, S., Cooke, S., Chen X. & Labes, M.M. Superconducting properties of alkali doped C<sub>60</sub> prepared by precipitation from liquid methylamine or ammonia. *Mol. Cryst. Liq. Cryst.* **284**, 139-147 (1996).
- [41] Wimbush, S.C., Schultz, L. & Holzapfel, B. Critical current in YNi<sub>2</sub>B<sub>2</sub>C and HoNi<sub>2</sub>B<sub>2</sub>C thin films, *Physica C* **388-389**, 191-192 (2003).
- [42] Hilscher, G. & Michor, H. Superconductivity and magnetism in quaternary borocarbides, in *Studies on High Temperature Superconductors*, ed. by A.V. Narlikar **28** (New York: Nova Science, 1999) p. 241.
- [43] Canepa, F., Manfrinetti, P., Palenzona, A., Cimberle, M.R., Giannini, E., Marrè, D. & Putti, M. Magnetic study of the superconducting phase YNi<sub>2</sub>B<sub>2</sub>C. *Il Nuovo Cimento* **16 D**, 1857 (1996).
- [44] Lu, X., Park, W.K., Yeo, S., Oh, K.-H., Lee, S.-I., Budko, S.L., Canfield, P.C., & Greene, L.H. Superconducting order parameter in nonmagnetic borocarbides RNi<sub>2</sub>B<sub>2</sub>C (R=Y,Lu) probed by point-contact Andreev reflection spectroscopy. *Phys. Rev. B* **83**, 104519 (2011).
- [45] Romijn, J., Klapwijk, T.M., Renne M.J. & Mooij, J.E. Critical pair-breaking current in superconducting aluminum strips far below  $T_c$ . *Phys. Rev. B* **26**, 3648-3655 (1982).
- [46] Prozorov, R. *et al.* Measurements of the absolute value of the penetration depth in high- $T_c$  superconductors using a low- $T_c$  superconductive coating. *Appl. Phys. Lett.* **77**, 4202-4204 (2000).
- [47] Doezema, R.E., Whitmore, S.C., & Huffaker, J.N. Quasiparticle magnetospectroscopy and penetration depth anisotropy in superconducting aluminum. *Phys. Rev. B* **34**, 4614-4621 (1986).
- [48] Biondi, M.A., & Garfunkel, M.P. Millimeter wave absorption in superconducting aluminum. II. Calculation of the skin depth. *Phys. Rev.* **116**, 862-867 (1982).
- [49] Hunt, T.K. Critical-current behavior in narrow thin-film superconductors. *Phys. Rev.* **151**, 325-327 (1966).
- [50] Peabody, G.E. & Meservey, R. Magnetic flux penetration into superconducting thin films.

- Phys. Rev. B* **6**, 2579-2595 (1972).
- [51] Nutley, M.P., Boothroyd, A.T., Staddon, C.R., D. Paul, D.McK. & Penfold, J. Magnetic-induction profile in a type-I superconductor by polarized-neutron reflectometry. *Phys. Rev. B* **49**, 15789-15798 (1994).
  - [52] Brisbois, J., Raes, B., Van de Vondel, J., Moshchalkov, V.V. & Silhanek, A.V. Determination of the magnetic penetration depth in a superconducting Pb film. *J. Appl. Phys.* **115**, 103906 (2014).
  - [53] Neumann, L.G. & Kao, Y.H. Temperature dependence of the critical current in one-dimensional indium strips. *J. Low Temp. Phys.* **48**, 321-330 (1982).
  - [54] Bellingeri, E. *et al.* Strong vortex pinning in FeSe<sub>0.5</sub>Te<sub>0.5</sub> epitaxial thin film. *Appl. Phys. Lett.* **100**, 082601 (2012).
  - [55] Bendele, M., *et al.* Anisotropic superconducting properties of single-crystalline FeSe<sub>0.5</sub>Te<sub>0.5</sub>. *Phys. Rev. B* **81**, 224520 (2010).
  - [56] Biswas, P.K., Balakrishnan, G., Paul, D.M., Tomy, C.V., Lees, M.R., & Hillier, A.D. Muon-spin-spectroscopy study of the penetration depth of FeSe<sub>0.5</sub>Te<sub>0.5</sub>. *Phys. Rev. B* **81**, 092510 (2010).
  - [57] Ukita, R., Sugimoto, A., & Ekino, T. Scanning tunneling microscopy and break-junction spectroscopy on the superconducting Fe(Se,Te) single crystal *Physica C* **484**, 22-26 (2013).
  - [58] Cichorek T., Mota, A.C., Steglich, F., Frederick, N.A., Yuhasz, W.M. & Maple, M.B. Pronounced enhancement of the lower critical field and critical current deep in the superconducting state of PrOs<sub>4</sub>Sb<sub>12</sub>. *Phys. Rev. Lett.* **94**, 107002 (2005).
  - [59] MacLaughlin, D.E. *et al.*, Muon spin relaxation and isotropic pairing in superconducting PrOs<sub>4</sub>Sb<sub>12</sub>. *Phys. Rev. Lett.* **89**, 157001 (2002).
  - [60] Bauer, E.D., Frederick, N.A., Ho, P.-C., Zapf, V.S. & Maple, M.B. Superconductivity and heavy fermion behavior in PrOs<sub>4</sub>Sb<sub>12</sub>. *Phys. Rev. B* **65**, 100506(R) (2002).
  - [61] Shu, L., MacLaughlin, D. E., Beyermann, W. P., Heffner, R. H., Morris, G. D., Bernal, O. O., Callaghan, F. D., Sonier, J. E., Yuhasz, W. M., Frederick, N. A., & Maple, M. B. Penetration depth, multiband superconductivity, and absence of muon-induced perturbation in superconducting PrOs<sub>4</sub>Sb<sub>12</sub>. *Phys. Rev. B* **79**, 174511 (2009).
  - [62] Chia, E.E.M., Salamon, M.B., Sugawara, H., & Sato, H. Probing the superconducting gap symmetry of PrOs<sub>4</sub>Sb<sub>12</sub>: a penetration depth study. *Phys. Rev. Lett.* **91**, 247003 (2003).

- [63] Sonier, J.E. *et al.* Hole-doping dependence of the magnetic penetration depth and vortex core size in  $\text{YBa}_2\text{Cu}_3\text{O}_y$ : Evidence for stripe correlations near  $1/8$  hole doping. *Phys. Rev. B* **76**, 134518 (2007).
- [64] Dagan, Y., Krupke, R., & Deutscher, G. Determination of the superconducting gap in  $\text{YBa}_2\text{Cu}_3\text{O}_{7-\delta}$  by tunneling experiments under magnetic fields. *Phys. Rev. B* **62**, 146-149 (2000).
- [65] Tallon, J.L., Bernhard, C. Binniger, U., Hofer, A., Williams, G.V.M., Ansaldo, E.J., Budnick, J.I. & Niedermayer, Ch. In-plane anisotropy of the penetration depth due to superconductivity on the CuO chains in  $\text{YBa}_2\text{Cu}_3\text{O}_{7-\delta}$ ,  $\text{Y}_2\text{Ba}_4\text{Cu}_7\text{O}_{15-\delta}$  and  $\text{YBa}_2\text{Cu}_4\text{O}_8$ . *Phys. Rev. Lett.* **74**, 1008-1011 (1995)
- [66] Wagner, P., Hillmer, F., Frey, U., & Adrian, H. Thermally activated flux movement and critical transport current density in epitaxial  $\text{Bi}_2\text{Sr}_2\text{CaCu}_2\text{O}_{8+\delta}$  films. *Phys. Rev. B* **49**, 13184-13192 (1994).
- [67] Ri, H.-C., Gross, R., Gollnik, F., Beck, A., Huebener, R.P., Wagner P. & Adrian, H. Nernst, Seebeck, and Hall effects in the mixed state of  $\text{YBa}_2\text{Cu}_3\text{O}_{7-\delta}$  and  $\text{Bi}_2\text{Sr}_2\text{CaCu}_2\text{O}_{8+x}$  thin films: A comparative study. *Phys. Rev. B* **50**, 3312-3329 (1994).
- [68] Mosqueira, J. *et al.* Thermal fluctuation effects on the magnetization above and below the superconducting transition in  $\text{Bi}_2\text{Sr}_2\text{CaCu}_2\text{O}_8$  crystals in the weak magnetic field limit. *Phys. Rev. B* **53**, 15272-15280 (1996).
- [69] Suzuki, A., & Suzuki, M. Tunneling studies of pseudo-gap in  $\text{Bi}_2\text{Sr}_2\text{CaCu}_{1.94}\text{Zn}_{0.06}\text{O}_{8-y}$ . *Physica C* **378-381** 306-310 (2002).
- [70] Hudáková, N., Samuely, P., Szabó, P., Plecháček, V., Knízek, K., & Sedmidubský, D. Scaling of the superconducting order parameter in Bi cuprates with  $T_c$ . *Physica C* **246**, 163-168 (1995).
- [71] Hänisch, J., Attenberger, A., Holzapfel, B., & Schultz, L. Electrical transport properties of  $\text{Bi}_2\text{Sr}_2\text{Ca}_2\text{Cu}_3\text{O}_{10+\delta}$  thin film [001] tilt grain boundaries. *Phys. Rev. B* **65**, 052507 (2002).
- [72] Li, Q., Suenaga, M., Gohng, J., Finnemore, D.K., Hikata, T., & Sato, K. Reversible magnetic properties of c-axis-oriented superconducting  $\text{Bi}_2\text{Sr}_2\text{Ca}_2\text{Cu}_3\text{O}_{10+\delta}$ . *Phys. Rev. B* **46**, 3195-3198 (1992).
- [73] Weigand, M., Eisterer, M., Giannini, E. & Weber, H.W. Mixed state properties of  $\text{Bi}_2\text{Sr}_2\text{Ca}_2\text{Cu}_3\text{O}_{10+\delta}$  single crystals before and after neutron irradiation. *Phys. Rev. B* **81**, 014516 (2010).

- [74] Holstein, W.L., Wilker, C., Laubacher, D.B., Face, D.W., Pang, P., Warrington, M.S., Carter, C.F. & Parisi, L.A. Critical current density and resistivity measurements for long patterned lines in  $\text{Tl}_2\text{Ba}_2\text{CaCu}_2\text{O}_8$  thin films. *J. Appl. Phys.* **74**, 1426-1430 (1993).
- [75] Kim, H.-J., Chowdhury, P., Jo, I.-S. & Lee, S.-I. Equilibrium magnetization of  $\text{Tl}_2\text{Ba}_2\text{CaCu}_2\text{O}_{8+\delta}$  single crystals. *Phys. Rev. B* **66**, 134508 (2002).
- [76] Moonen, J.T. & Brom, H.B. Vortex-mobility determined NMR properties in highly anisotropic high- $T_c$  superconductors II. Experiment on  $\text{Tl}_2\text{Ba}_2\text{CaCu}_2\text{O}_8$ . *Physica C* **244**, 10-20 (1995).
- [77] Huang, Q., Zasadzinski, J.F., Gray, K.E., Bukowski, E.D., & Ginsberg, D.M. Point-contact tunneling study of the normal and superconducting states of  $\text{Tl}_2\text{Ba}_2\text{CaCu}_2\text{O}_x$ . *Physica C* **161**, 141-144 (1989).
- [78] Krusin-Elbaum, L., Tsuei, C.C & Gupta, A. High current densities above 100 K in the high-temperature superconductor  $\text{HgBa}_2\text{CaCu}_2\text{O}_{6+\delta}$ . *Nature* **373**, 679-681 (1995).
- [79] Puźniak, R., Usami, R., Isawa, K., & Yamauchi, H. Superconducting-state thermodynamic parameters and anisotropy of  $\text{HgBa}_2\text{Ca}_{n-1}\text{Cu}_n\text{O}_y$  by reversible magnetization measurements. *Phys. Rev. B* **52**, 3756-3764 (1995).
- [80] Thompson, J.R., Ossandon, J.G., Christen, D.K., Paranthaman, M., Specht, E.D. & Kim, Y.C. Comparative study of the characteristic length scales and fields of Hg-based high- $T_c$  superconductors. *Phys. Rev. B* **54**, 7505-7511 (1996).
- [81] Sacuto, A., Cayssol, J., Monod, P., & Colson, D. Electronic Raman scattering on the underdoped  $\text{HgBa}_2\text{Ca}_2\text{Cu}_3\text{O}_{8+d}$  high- $T_c$  superconductor: The symmetry of the order parameter. *Phys. Rev. B* **61** 7122-29 (2000).
- [82] Won, H. & Maki, K.  $d$ -wave superconductor as a model of high- $T_c$  superconductors. *Phys. Rev. B* **49**, 1397-1402 (1994).
- [83] Kogan, V.G., Martin C. & Prozorov, R. Superfluid density and specific heat within a self-consistent scheme for a two-band superconductor. *Phys. Rev. B* **80**, 014507 (2009).
- [84] Homes, C. C., Akrap, A., Wen, J. S., Xu, Z. J., Lin, Z. W., Li, Q., & Gu, G. D. Electronic correlations and unusual superconducting response in the optical properties of the iron chalcogenide  $\text{FeTe}_{0.55}\text{Se}_{0.45}$ . *Phys. Rev. B* **81**, 180508(R) (2010).
- [85] Yu, L., *et al.* Evidence for two separate energy gaps in underdoped high-temperature cuprate superconductors from broadband infrared ellipsometry. *Phys. Rev. Lett.* **100**, 177004 (2008).
- [86] Bernhard, C., Tallon, J.L., Blasius, Th., Golnik, A., & Niedermayer, Ch. Anomalous peak

- in the superconducting condensate density of cuprate high- $T_c$  superconductors at a unique doping state. *Phys. Rev. Lett.* **86**, 1614 (2001).
- [87] Silsbee, F.B. Note on electrical conduction in metals at low temperatures. *J. Franklin Inst.* **184**, 111 (1917).
- [88] Brojeny, A.B. & Clem, J.R., Self-field effects upon critical current density of flat superconducting strips. *Supercond. Sci. Technol.* **18**, 888-895 (2005).
- [89] Brandt, E.H. & Indenbom, M., Type-II-superconductor strip with current in a perpendicular magnetic field. *Phys. Rev. B* **48**, 12893-12906 (1993).
- [90] Stejic, G., Gurevich, A., Kadyrov, E., Christen, D., Joynt, R., & Larbalestier, D. C., Effect of geometry on the critical currents of thin films. *Phys. Rev. B* **49**, 1274-1288 (1994).
- [91] Dinner, R.B., Robinson, A.P., Wimbush, S.C., MacManus-Driscoll, J.L., & Blamire, M.G. Depairing critical current achieved in superconducting thin films with through-thickness arrays of artificial pinning centers. *Supercond. Sci. Technol.* **24** 055017 (2011).
- [92] MacManus-Driscoll, J.L. *et al.* Strongly enhanced current densities in superconducting coated conductors of  $\text{YBa}_2\text{Cu}_3\text{O}_{7-x} + \text{BaZrO}_3$ . *Nature Materials* **3** 439-443 (2004).
- [93] Strickland, N.M., Talantsev, E.F., Xia, J.A., Long, N.J., Rupich, M.W., Li, X., & Zhang, W. Flux pinning by barium stannate nanoparticles in MOD YBCO coated conductors. *IEEE Trans. Appl. Supercon.* **19**, 3140-3143 (2009).
- [94] Birlik, I., Erbe, M., Freudenberg, T., Celik, E., Schultz, L., & Holzapfel, B. Flux pinning improvement of YBCO superconducting films with  $\text{BaZrO}_3$  nanoparticles prepared by chemical solution deposition method. *J. Phys.: Conf. Series* **234** 012004 (2010).
- [95] Lu, F., Kametani, F., & Hellstrom, E.E. Film growth of  $\text{BaZrO}_3$ -doped  $\text{YBa}_2\text{Cu}_3\text{O}_{7-\delta}$  by using fluorine-free metalorganic deposition. *Supercond. Sci. Technol.* **25** 015011 (2012).
- [96] Haruta, M., Saura, K., Fujita, N., Ogura, Y., Ichinose, A., Maeda, T., & Horii, S. Relationship between vortex pinning properties and microstructure in  $\text{BaNbO}$ -doped  $\text{YBa}_2\text{Cu}_3\text{O}_y$  and  $\text{ErBa}_2\text{Cu}_3\text{O}_y$  films. *Physica C* **494** 158-162 (2013).
- [97] Poole, C.P., Farach, H.A., Creswick, R.J., Prozorov, R. *Superconductivity* p. 141, 154 (Academic Press, London, 2007).
